# Supplementary material
Source: MDPI journal article supplement (https://www.mdpi.com/1999-4907/12/8/1009)
Supplement: s1 [file s1]

**Supplementary Materials:**

Table S1. Predictor variables

| Variable           | Name       | Description                                                                   | Source                                           |
|--------------------|------------|-------------------------------------------------------------------------------|--------------------------------------------------|
| Climatic Factor    | Bio1       | Annual Mean Temperature                                                       | Global Climate Dataset CHELSA V.1.2. (2004–2013) |
|                    | Bio2       | Mean Diurnal Range                                                            |                                                  |
|                    | Bio3       | Isothermality                                                                 |                                                  |
|                    | Bio4       | Temperature Seasonality                                                       |                                                  |
|                    | Bio5       | Max Temperature of Warmest Month                                              |                                                  |
|                    | Bio6       | Min Temperature of Coldest Month                                              |                                                  |
|                    | Bio7       | Temperature Annual Range                                                      |                                                  |
|                    | Bio8       | Mean Temperature of Wettest Quarter                                           |                                                  |
|                    | Bio9       | Mean Temperature of Driest Quarter                                            |                                                  |
|                    | Bio10      | Mean Temperature of Warmest Quarter                                           |                                                  |
|                    | Bio11      | Mean Temperature of Coldest Quarter                                           |                                                  |
|                    | Bio12      | Annual Precipitation                                                          |                                                  |
|                    | Bio13      | Precipitation of Wettest Month                                                |                                                  |
|                    | Bio14      | Precipitation of Driest Month                                                 |                                                  |
|                    | Bio15      | Precipitation Seasonality                                                     |                                                  |
|                    | Bio16      | Precipitation of Wettest Quarter                                              |                                                  |
|                    | Bio17      | Precipitation of Driest Quarter                                               |                                                  |
|                    | Bio18      | Precipitation of Warmest Quarter                                              |                                                  |
|                    | Bio19      | Precipitation of Coldest Quarter                                              |                                                  |
|                    | WI         | Warmth Index                                                                  |                                                  |
|                    | MTCI       | Minimum Temperature of the Coldest Month Index                                |                                                  |
|                    | PEI        | Precipitation Effectiveness Index                                             |                                                  |
|                    | GDD        | Growing Degree Days                                                           |                                                  |
| Soil Factor        | BLDFIE     | Bulk Density (fine earth) in kg/m <sup>3</sup> at 0.00 m depth                | World Soil Data (SoilGrids 250m 2.0)             |
|                    | CLYPPT     | Clay content (0–2 µm) mass fraction in % at 0.00 m depth                      |                                                  |
|                    | CRFVOL     | Coarse fragment volumetric in % at 0.00 m depth                               |                                                  |
|                    | SLTPPT     | Silt content (2–50 µm) mass fraction % at 0.00 m depth                        |                                                  |
|                    | SNDPPT     | Sand content (50–2000 µm) mass fraction % at 0.00 m depth                     |                                                  |
|                    | CECSOL     | Cation exchange capacity of soil in cmolc/kg at 0.00 m depth                  |                                                  |
|                    | ORCDRC     | Soil organic carbon content (fine earth fraction) in g per kg at 0.00 m depth |                                                  |
|                    | PHIHOX     | Soil pH × 10 in H <sub>2</sub> O at 0.00 m depth                              |                                                  |
|                    | PHIKCL     | Soil pH × 10 in KCl at 0.00 m depth                                           |                                                  |
| Topographic Factor | DEM Aspect | Digital Elevation Model Aspect                                                | National Geographic                              |

| Variable             | Name    | Description                                   | Source                                                                           |
|----------------------|---------|-----------------------------------------------|----------------------------------------------------------------------------------|
|                      | Slope   | Slope                                         | Information<br>Institute database                                                |
| Artificial<br>Factor | LC      | Land Cover map                                | Ministry of<br>Environment (2007)                                                |
|                      | Roads   | Distance from roads                           | Standard Node<br>Link from National<br>Transport<br>Information Center<br>(2015) |
| Vegetation<br>Factor | MaxNDVI | Normalized Difference Vegetation<br>Index     |                                                                                  |
|                      | MaxARVI | Atmospherically Resistant Vegetation<br>Index | Landsat-5 and<br>Landsat-7 Surface                                               |
|                      | MaxRDVI | Renormalized Difference Vegetation<br>Index   | Reflectance Tier 1<br>images (2011-2015)                                         |
|                      | MaxSAVI | Soil Adjusted Vegetation Index                |                                                                                  |
|                      | MaxSR   | Simple Ratio                                  |                                                                                  |
